# Supplementary material for: Subcutaneous trastuzumab with pertuzumab and docetaxel in HER2-positive metastatic breast cancer: Final analysis of MetaPHER, a phase IIIb single-arm safety study
Source: PubMed Central journal article supplement (PMC8189949; doi:10.1007/s10549-021-06145-3), 2021-03-21
Supplement: 10549_2021_6145_MOESM2_ESM.pdf [file 10549_2021_6145_MOESM2_ESM.pdf]

**Article type:** Original Research Article

**Title:** Subcutaneous trastuzumab with pertuzumab and docetaxel in HER2-positive metastatic breast cancer: Final analysis of MetaPHER, a phase IIIb single-arm safety study

**Authors:** Sherko Kuemmel<sup>1,2\*</sup>, Carlo A. Tondini<sup>3</sup>, Jacinta Abraham<sup>4</sup>, Zbigniew Nowecki<sup>5</sup>, Bartosz Itrych<sup>6,†</sup>, Erika Hitre<sup>7</sup>, Bogusława Karaszewska<sup>8</sup>, Alejandro Juárez-Ramiro<sup>9</sup>, Flavia Morales-Vásquez<sup>10</sup>, Jose Manuel Pérez García<sup>11‡</sup>, Servando Cardona-Huerta<sup>12</sup>, Estefania Monturus<sup>13</sup>, Marco Sequi<sup>14,15§</sup>, Eleonora Restuccia<sup>13</sup>, Mark Benyunes<sup>16</sup> and Miguel Martín<sup>17</sup>

**Author affiliations:**

<sup>1</sup> Breast Unit, Kliniken Essen-Mitte, Essen, Germany

<sup>2</sup> Clinic for Gynecology with Breast Center, Charité – Universitätsmedizin Berlin, Berlin, Germany

<sup>3</sup> Department of Onco-Hematology, ASST Papa Giovanni XXIII, Bergamo, Italy

<sup>4</sup> Department of Clinical Oncology, Velindre Cancer Centre, Cardiff, UK

<sup>5</sup> Klinika Nowotworów Piersi i Chirurgii Rekonstrukcyjnej, Centrum Onkologii-Instytut, Warsaw, Poland

<sup>6</sup> Department of Oncology, Magodent, Warsaw, Poland

<sup>7</sup> Department of Medical Oncology and Clinical Pharmacology “B”, National Institute of Oncology, Budapest, Hungary

<sup>8</sup> Przychodnia Lekarska KOMED, Konin, Poland

<sup>9</sup> Medical Oncology, CME Consultorio de Medicina Especializada, Mexico City, Mexico

<sup>10</sup> FUCAM, Instituto Nacional de Cancerología de Mexico, Mexico City, Mexico

<sup>11</sup> Medical Oncology Department, Vall d'Hebron Institute of Oncology (VHIO), Hospital Universitari Vall d'Hebron, Barcelona, Spain

<sup>12</sup> Centro de Cáncer de Mama, Hospital Zambrano-Hellion, Tecnológico de Monterrey, Monterrey, Mexico

<sup>13</sup> Global Product Development, F. Hoffmann-La Roche Ltd, Basel, Switzerland

<sup>14</sup> Biostatistics, F. Hoffmann-La Roche Ltd, Basel, Switzerland

<sup>15</sup> Biostatistics, PAREXEL, Milan, Italy

<sup>16</sup> Global Product Development, Genentech, Inc., South San Francisco, CA, USA

<sup>17</sup> Instituto de Investigación Sanitaria Gregorio Marañón, CIBERONC, Departamento de Medicina, Universidad Complutense de Madrid, Madrid, Spain

**\* Corresponding author:** Sherko Kuemmel, MD, PhD

**Address:** Breast Unit, Kliniken Essen-Mitte, Henricistrasse 92, 45136 Essen, Germany

**Telephone:** +49-201-174-33001

**Email:** [s.kuemmel@kem-med.com](mailto:s.kuemmel@kem-med.com)

**† Current address:** Department of Oncology and Hematology, Central Clinical Hospital MSWiA, Warsaw, Poland (Itrych)

‡ **Current address:** International Breast Cancer Center (IBCC), Quiron Group, Barcelona,  
Spain (Pérez García)

§ Current address: CROS Academy, Bologna, Italy (Sequi)

**Target journal:** *Breast Cancer Research and Treatment*

**Online Resource 2** – Baseline demographics and disease characteristics, and treatment history

|                                       | H SC + P IV + D IV<br>(N = 412) |
|---------------------------------------|---------------------------------|
| Mean age, years (SD)                  | 55.6 (11.7)                     |
| Age group                             |                                 |
| <65 years                             | 310 (75.2)                      |
| ≥65 years                             | 102 (24.8)                      |
| Ethnicity                             |                                 |
| Hispanic or Latina                    | 69 (16.7)                       |
| Not Hispanic or Latina                | 305 (74)                        |
| Not stated/unknown                    | 38 (9.3)                        |
| Race                                  |                                 |
| Asian                                 | 2 (0.5)                         |
| Black                                 | 8 (1.9)                         |
| White                                 | 347 (84.2)                      |
| American Indian or Alaska Native      | 26 (6.3)                        |
| Other                                 | 2 (0.5)                         |
| Unknown                               | 27 (6.6)                        |
| Reproductive status                   |                                 |
| Postmenopausal                        | 257 (62.4)                      |
| Surgically/naturally sterile          | 45 (10.9)                       |
| With contraceptive protection         | 110 (26.7)                      |
| Without contraceptive protection      | 0                               |
| Breast cancer histology <sup>a</sup>  |                                 |
| Ductal                                | 356 (86.4)                      |
| Lobular                               | 28 (6.8)                        |
| Medullary                             | 0                               |
| Tubular                               | 2 (0.5)                         |
| Mucinous                              | 3 (0.7)                         |
| Comedo                                | 3 (0.7)                         |
| Inflammatory                          | 0                               |
| Not otherwise specified               | 15 (3.6)                        |
| Other                                 | 9 (2.2)                         |
| Disease type at screening             |                                 |
| Visceral                              | 306 (74.3)                      |
| Non-visceral                          | 106 (25.7)                      |
| Disease status <sup>b</sup>           |                                 |
| Locally recurrent                     | 21 (5.1)                        |
| Locally advanced unresectable         | 37 (9.0)                        |
| Metastatic                            | 401 (97.3)                      |
| Hormonal status                       |                                 |
| ER- and PgR-negative                  | 119 (28.9)                      |
| ER- and/or PgR-positive               | 290 (70.4)                      |
| Unknown                               | 3 (0.7)                         |
| Prior treatment history               |                                 |
| No prior neoadjuvant or adjuvant only | 202 (49.0)                      |
| Trastuzumab                           | 131 (31.8)                      |

|                             |            |
|-----------------------------|------------|
| Taxane                      | 135 (32.8) |
| Anthracyclines <sup>c</sup> | 163 (39.6) |
| Prior hormonal therapy      | 139 (33.7) |
| Radiotherapy                | 186 (45.1) |

<sup>a</sup> *N* = 411 as the histologic subtype of right breast cancer of one patient was confirmed as unknown at the time of data cutoff. Patients could have more than one type of breast cancer histology

<sup>b</sup> Patients could have more than one disease status

<sup>c</sup> Of the 216 (52.4%) patients who received at least one prior systematic therapy (neoadjuvant, adjuvant, metastatic, or other), 162 (75.3%) received an anthracycline regimen

*D IV* intravenous docetaxel, *ER* estrogen receptor, *H SC* subcutaneous trastuzumab, *PgR* progesterone receptor, *P IV* intravenous pertuzumab, *SD* standard deviation

Data are number of patients (%)
