# Supplementary material for: Subcutaneous trastuzumab with pertuzumab and docetaxel in HER2-positive metastatic breast cancer: Final analysis of MetaPHER, a phase IIIb single-arm safety study
Source: Springer Nature journal article supplement (doi:10.1007/s10549-021-06145-3), 2021-03-21
Supplement: MOESM4 [file 18988236]

**Article type:** Original Research Article

**Title:** Subcutaneous trastuzumab with pertuzumab and docetaxel in HER2-positive metastatic breast cancer: Final analysis of MetaPHER, a phase IIIb single-arm safety study

**Authors:** Sherko Kuemmel<sup>1,2\*</sup>, Carlo A. Tondini<sup>3</sup>, Jacinta Abraham<sup>4</sup>, Zbigniew Nowecki<sup>5</sup>, Bartosz Itrych<sup>6,†</sup>, Erika Hitre<sup>7</sup>, Bogusława Karaszewska<sup>8</sup>, Alejandro Juárez-Ramiro<sup>9</sup>, Flavia Morales-Vásquez<sup>10</sup>, Jose Manuel Pérez García<sup>11‡</sup>, Servando Cardona-Huerta<sup>12</sup>, Estefania Monturus<sup>13</sup>, Marco Sequi<sup>14,15§</sup>, Eleonora Restuccia<sup>13</sup>, Mark Benyunes<sup>16</sup> and Miguel Martín<sup>17</sup>

**Author affiliations:**

<sup>1</sup> Breast Unit, Kliniken Essen-Mitte, Essen, Germany

<sup>2</sup> Clinic for Gynecology with Breast Center, Charité – Universitätsmedizin Berlin, Berlin, Germany

<sup>3</sup> Department of Onco-Hematology, ASST Papa Giovanni XXIII, Bergamo, Italy

<sup>4</sup> Department of Clinical Oncology, Velindre Cancer Centre, Cardiff, UK

<sup>5</sup> Klinika Nowotworów Piersi i Chirurgii Rekonstrukcyjnej, Centrum Onkologii-Instytut, Warsaw, Poland

<sup>6</sup> Department of Oncology, Magodent, Warsaw, Poland

<sup>7</sup> Department of Medical Oncology and Clinical Pharmacology “B”, National Institute of Oncology, Budapest, Hungary

<sup>8</sup> Przychodnia Lekarska KOMED, Konin, Poland

<sup>9</sup> Medical Oncology, CME Consultorio de Medicina Especializada, Mexico City, Mexico

<sup>10</sup> FUCAM, Instituto Nacional de Cancerología de Mexico, Mexico City, Mexico

<sup>11</sup> Medical Oncology Department, Vall d'Hebron Institute of Oncology (VHIO), Hospital Universitari Vall d'Hebron, Barcelona, Spain

<sup>12</sup> Centro de Cáncer de Mama, Hospital Zambrano-Hellion, Tecnológico de Monterrey, Monterrey, Mexico

<sup>13</sup> Global Product Development, F. Hoffmann-La Roche Ltd, Basel, Switzerland

<sup>14</sup> Biostatistics, F. Hoffmann-La Roche Ltd, Basel, Switzerland

<sup>15</sup> Biostatistics, PAREXEL, Milan, Italy

<sup>16</sup> Global Product Development, Genentech, Inc., South San Francisco, CA, USA

<sup>17</sup> Instituto de Investigación Sanitaria Gregorio Marañón, CIBERONC, Departamento de Medicina, Universidad Complutense de Madrid, Madrid, Spain

**\* Corresponding author:** Sherko Kuemmel, MD, PhD

**Address:** Breast Unit, Kliniken Essen-Mitte, Henricistrasse 92, 45136 Essen, Germany

**Telephone:** +49-201-174-33001

**Email:** [s.kuemmel@kem-med.com](mailto:s.kuemmel@kem-med.com)

**† Current address:** Department of Oncology and Hematology, Central Clinical Hospital MSWiA, Warsaw, Poland (Itrych)

‡ **Current address:** International Breast Cancer Center (IBCC), Quiron Group, Barcelona,  
Spain (Pérez García)

§ Current address: CROS Academy, Bologna, Italy (Sequi)

**Target journal:** *Breast Cancer Research and Treatment*

**Online Resource 4 – Changes in mean LVEF over time**

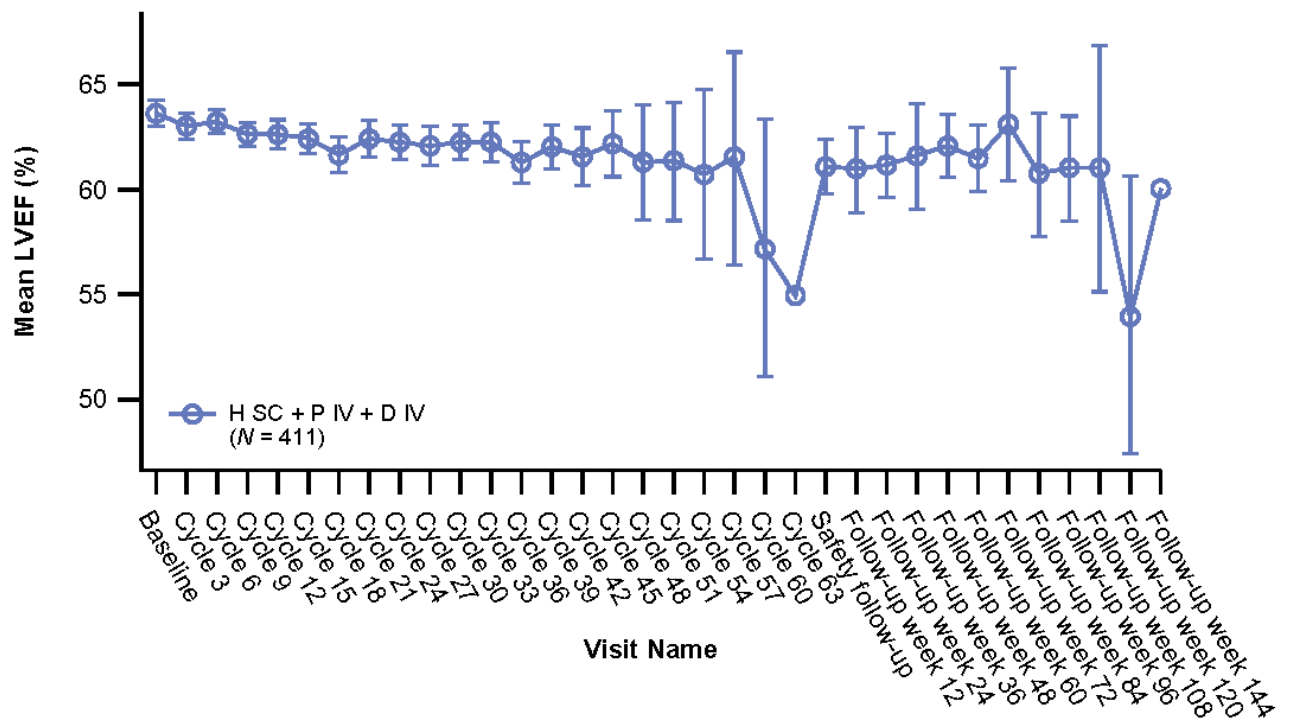

|             |           |           |           |           |           |           |
|-------------|-----------|-----------|-----------|-----------|-----------|-----------|
| <b>n</b>    | 411       | 233       | 110       | 12        | 113       | 17        |
| <b>Mean</b> | 63.6      | 61.7      | 61.3      | 60.7      | 61.1      | 61.0      |
| <b>95%</b>  | 63.0–64.2 | 60.9–62.4 | 60.3–62.2 | 56.7–64.6 | 59.6–62.6 | 58.6–63.5 |
