# Supplementary material for: Subcutaneous trastuzumab with pertuzumab and docetaxel in HER2-positive metastatic breast cancer: Final analysis of MetaPHER, a phase IIIb single-arm safety study
Source: Springer Nature journal article supplement (doi:10.1007/s10549-021-06145-3), 2021-03-21
Supplement: MOESM6 [file 18988236]

**Article type:** Original Research Article

**Title:** Subcutaneous trastuzumab with pertuzumab and docetaxel in HER2-positive metastatic breast cancer: Final analysis of MetaPHER, a phase IIIb single-arm safety study

**Authors:** Sherko Kuemmel<sup>1,2\*</sup>, Carlo A. Tondini<sup>3</sup>, Jacinta Abraham<sup>4</sup>, Zbigniew Nowecki<sup>5</sup>, Bartosz Itrych<sup>6,†</sup>, Erika Hitre<sup>7</sup>, Bogusława Karaszewska<sup>8</sup>, Alejandro Juárez-Ramiro<sup>9</sup>, Flavia Morales-Vásquez<sup>10</sup>, Jose Manuel Pérez García<sup>11‡</sup>, Servando Cardona-Huerta<sup>12</sup>, Estefania Monturus<sup>13</sup>, Marco Sequi<sup>14,15§</sup>, Eleonora Restuccia<sup>13</sup>, Mark Benyunes<sup>16</sup> and Miguel Martín<sup>17</sup>

**Author affiliations:**

<sup>1</sup> Breast Unit, Kliniken Essen-Mitte, Essen, Germany

<sup>2</sup> Clinic for Gynecology with Breast Center, Charité – Universitätsmedizin Berlin, Berlin, Germany

<sup>3</sup> Department of Onco-Hematology, ASST Papa Giovanni XXIII, Bergamo, Italy

<sup>4</sup> Department of Clinical Oncology, Velindre Cancer Centre, Cardiff, UK

<sup>5</sup> Klinika Nowotworów Piersi i Chirurgii Rekonstrukcyjnej, Centrum Onkologii-Instytut, Warsaw, Poland

<sup>6</sup> Department of Oncology, Magodent, Warsaw, Poland

<sup>7</sup> Department of Medical Oncology and Clinical Pharmacology “B”, National Institute of Oncology, Budapest, Hungary

<sup>8</sup> Przychodnia Lekarska KOMED, Konin, Poland

<sup>9</sup> Medical Oncology, CME Consultorio de Medicina Especializada, Mexico City, Mexico

<sup>10</sup> FUCAM, Instituto Nacional de Cancerología de Mexico, Mexico City, Mexico

<sup>11</sup> Medical Oncology Department, Vall d'Hebron Institute of Oncology (VHIO), Hospital Universitari Vall d'Hebron, Barcelona, Spain

<sup>12</sup> Centro de Cáncer de Mama, Hospital Zambrano-Hellion, Tecnológico de Monterrey, Monterrey, Mexico

<sup>13</sup> Global Product Development, F. Hoffmann-La Roche Ltd, Basel, Switzerland

<sup>14</sup> Biostatistics, F. Hoffmann-La Roche Ltd, Basel, Switzerland

<sup>15</sup> Biostatistics, PAREXEL, Milan, Italy

<sup>16</sup> Global Product Development, Genentech, Inc., South San Francisco, CA, USA

<sup>17</sup> Instituto de Investigación Sanitaria Gregorio Marañón, CIBERONC, Departamento de Medicina, Universidad Complutense de Madrid, Madrid, Spain

**\* Corresponding author:** Sherko Kuemmel, MD, PhD

**Address:** Breast Unit, Kliniken Essen-Mitte, Henricistrasse 92, 45136 Essen, Germany

**Telephone:** +49-201-174-33001

**Email:** [s.kuemmel@kem-med.com](mailto:s.kuemmel@kem-med.com)

**† Current address:** Department of Oncology and Hematology, Central Clinical Hospital MSWiA, Warsaw, Poland (Itrych)

‡ **Current address:** International Breast Cancer Center (IBCC), Quiron Group, Barcelona,  
Spain (Pérez García)

§ Current address: CROS Academy, Bologna, Italy (Sequi)

**Target journal:** *Breast Cancer Research and Treatment*

## Online Resource 6 – Prevalence and incidence of baseline and post-baseline ADAs to H SC

|                                                      | H SC + P IV + D IV<br>(N = 412) |
|------------------------------------------------------|---------------------------------|
| Baseline prevalence of ADAs to H SC                  |                                 |
| Baseline evaluable patients                          | 398                             |
| Patients with a positive sample at baseline          | 56 (14.1)                       |
| Patients with no positive sample at baseline         | 342 (85.9)                      |
| Post-baseline incidence of ADAs to H SC              |                                 |
| Post-baseline evaluable patients                     | 396                             |
| Patients positive for ADAs                           | 95 (24)                         |
| Treatment-induced ADAs                               | 82                              |
| Treatment-enhanced ADAs                              | 13                              |
| Patients indeterminate for ADAs                      | 1                               |
| Patients negative for ADAs                           | 300                             |
| Treatment unaffected                                 | 41                              |
| Patients with treatment-induced ADAs                 | 82 (20.7)                       |
| Patients with treatment-transient ADAs <sup>a</sup>  | 42 (51.2)                       |
| Patients with treatment-persistent ADAs <sup>b</sup> | 40 (48.8)                       |
| Median time to onset to ADA, weeks                   | 3.00                            |
| ADA titer range                                      | 1.00–512.00                     |
| ARR by ADA to H SC                                   |                                 |
| Patients with ADA-negative result post-baseline      | 300                             |
| Patients with ARR                                    | 17 (5.7)                        |
| Patients with ARR of grade $\geq 3$                  | 0                               |
| Patients with ADA-positive result post-baseline      | 95                              |
| Patients with ARR                                    | 2 (2.1)                         |
| Treatment-induced                                    | 2 (100.0)                       |
| Patients with ARR of grade $\geq 3$                  | 0                               |

<sup>a</sup> **Treatment-transient ADA:** ADA-positive result detected:

- A) At only one post-baseline sampling timepoint (excluding last timepoint), or
- B) At two or more timepoints during treatment the first and the last ADA-positive samples are separated by a period of less than 16 weeks.

<sup>b</sup> **Treatment-persistent ADA:** ADA-positive result detected:

- A) At the last post-baseline sampling timepoint, or
- B) At two or more timepoints during treatment, the first and the last ADA-positive samples are separated by a period of more than 16 weeks

ADA antidrug antibody, ARR administration-related reaction, D IV intravenous docetaxel, H SC subcutaneous trastuzumab, P IV intravenous pertuzumab

Data are number of patients (%) who received subsequent treatment for breast cancer. Percentages are based on the number of the respective category
